# Supplementary material for: A disposable paper-based electrochemiluminescence device for ultrasensitive monitoring of CEA based on Ru(bpy)32+@Au nanocages
Source: Royal Society of Chemistry journal article supplement (doi:10.1039/c5ra00393h), 2015-01-01
Supplement: c5ra00393h1.pdf [file c5ra00393h1.pdf]

**A disposable paper-based electrochemiluminescence device for ultrasensitive monitoring of**

**CEA based on Ru(bpy)<sub>3</sub><sup>2+</sup>@Au nanocages**

Chaomin Gao<sup>a</sup>, Min Su<sup>a</sup>, Yanhu Wang<sup>a</sup>, Shenguang Ge<sup>b</sup>, Jinghua Yu<sup>a\*</sup>

<sup>a</sup> *Key Laboratory of Chemical Sensing & Analysis in Universities of Shandong, School of Chemistry and Chemical Engineering, University of Jinan, Jinan 250022 (P. R. China)*

<sup>b</sup> *Shandong Provincial Key Laboratory of Fluorine Chemistry and Chemical Materials, University of Jinan, Jinan 250022 (P.R. China)*

\*Corresponding authors: Jinghua Yu

E-mail: [ujn.yujh@gmail.com](mailto:ujn.yujh@gmail.com)

Telephone: +86-531-82767161

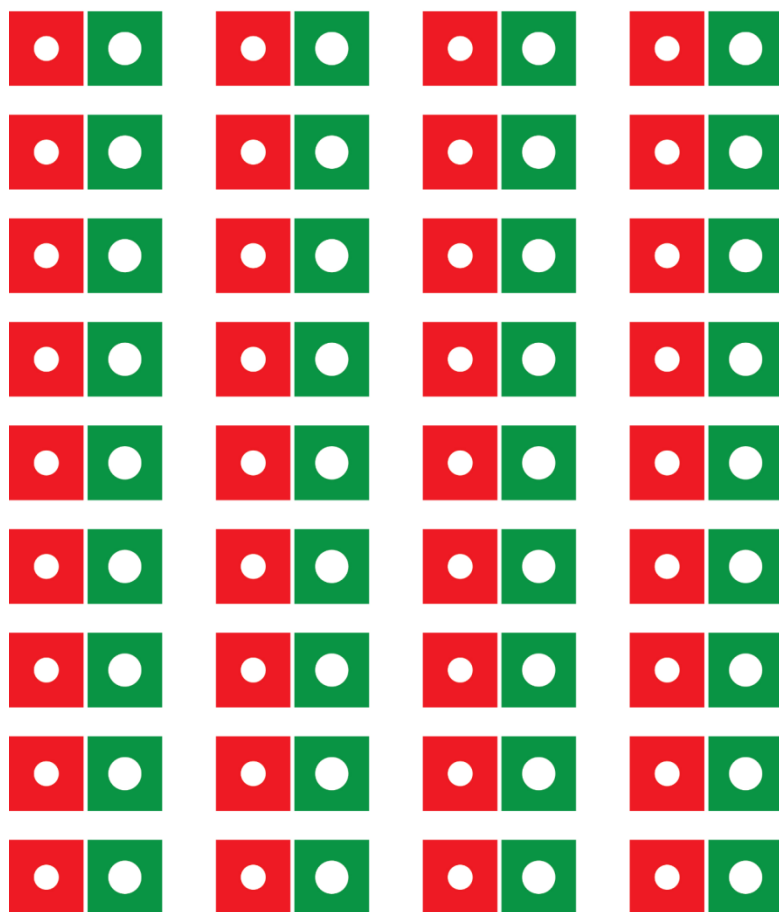

Fig.S1 The origami device designed by Adobe illustrator CS4.

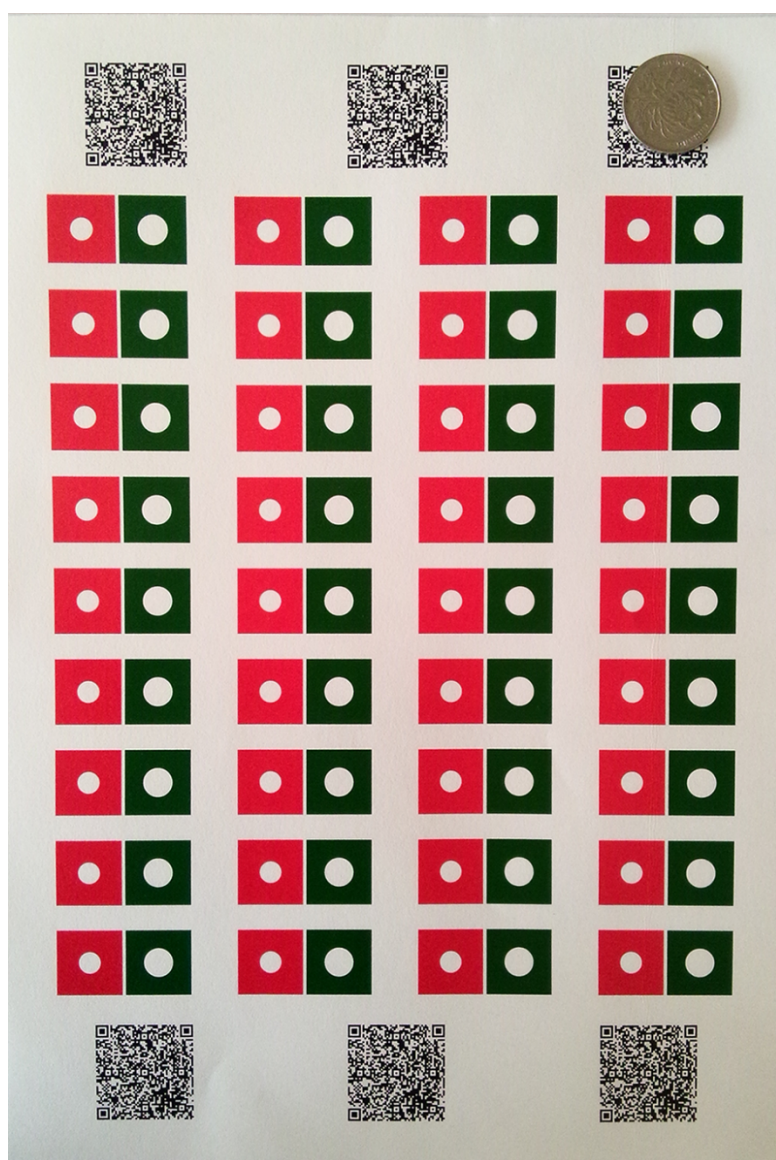

Fig.S2 Wax-printed 3D  $\mu$ -PADs on a paper sheet (A4) before baking.

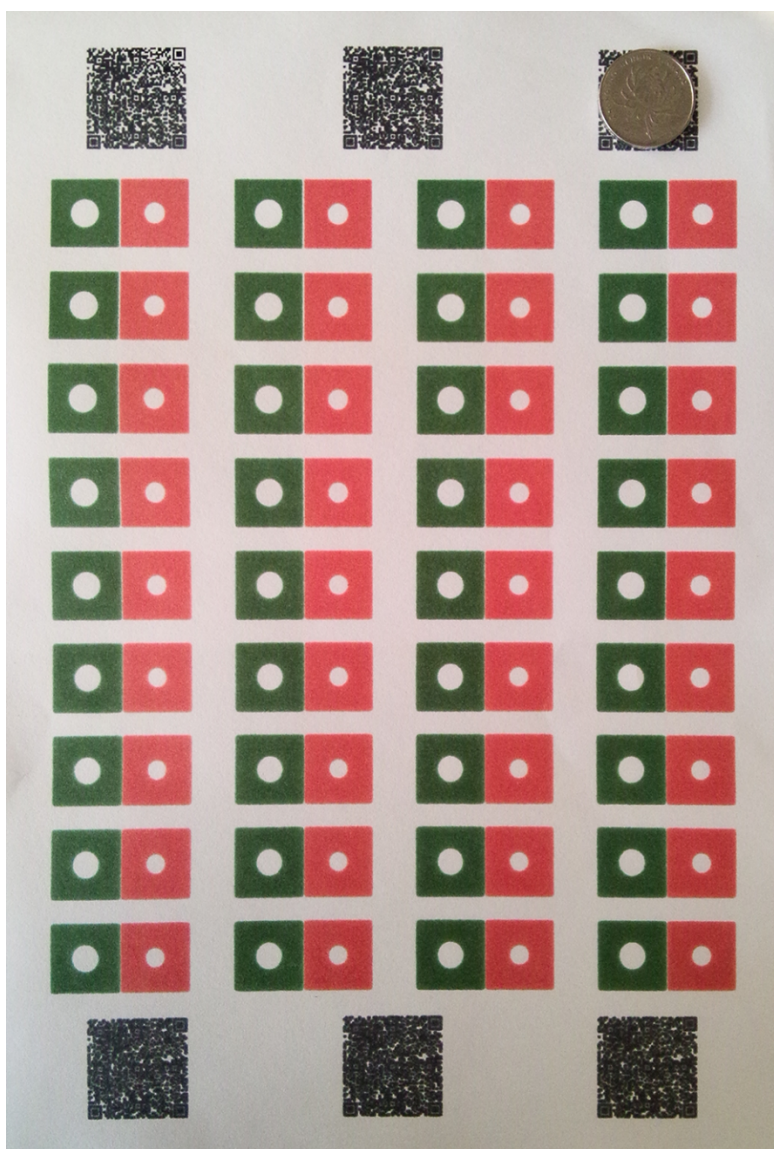

Fig.S3 Wax-printed 3D  $\mu$ -PADs on a paper sheet (A4) after baking.

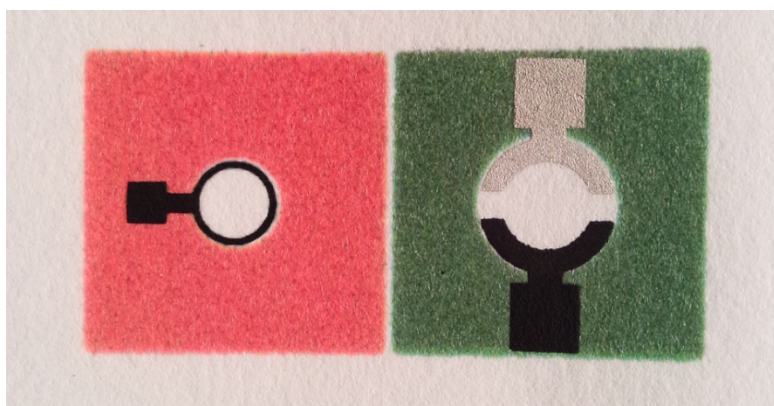

Fig.S4 3D  $\mu$ -PADs on a paper sheet (A4) after screen-printing of Ag/AgCl auxiliary electrode and carbon counter electrode on one surface of paper.
